# Supplementary material for: Elevated troponin levels as a predictor of mortality in patients with acute stroke: a systematic review and meta-analysis
Source: Frontiers journal article supplement (doi:10.3389/fneur.2024.1351925), 2024-03-25

### **Supplementary figure legends**

**Figure S1 (A-C):** Funnel plot for the prediction of In-hospital mortality in (A) AIS (B) SAH and (C) ICH with respect to elevated cTn Levels

**Figure S2 (A-B):** Funnel plot for the prediction of Last follow-up mortality in (a) AIS and (B) SAH with respect to elevated cTn Levels

**Figure S3 (A-C):** Sensitivity plot for the prediction of In-hospital mortality in (A) AIS (B) SAH and (C) ICH with respect to elevated cTn Levels

**Figure S4 (A-B):** Sensitivity plot for the prediction of last follow-up mortality in (A) AIS and (B) SAH with respect to elevated cTn Levels

**Figure S1 (A-C):** Funnel plot for the prediction of In-hospital mortality in acute stroke with respect to elevated cTn Levels

(A) AIS: p-value= 0.45

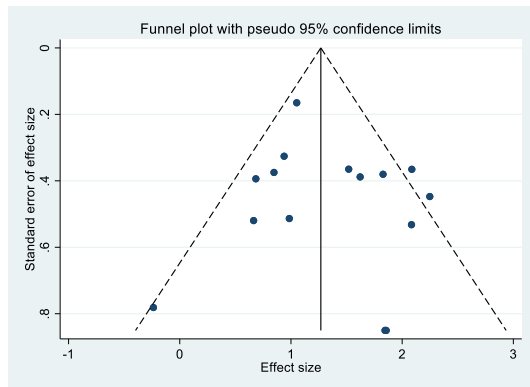

(B) SAH: p-value= 0.10

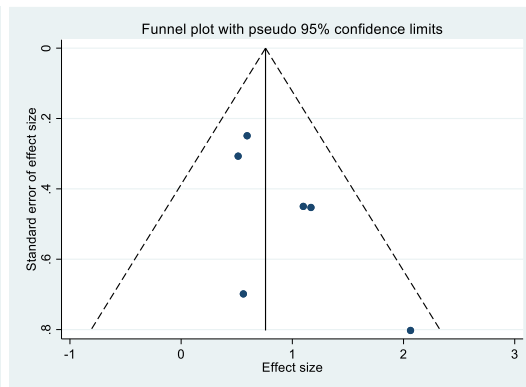

(C) ICH: p-value= 0.19

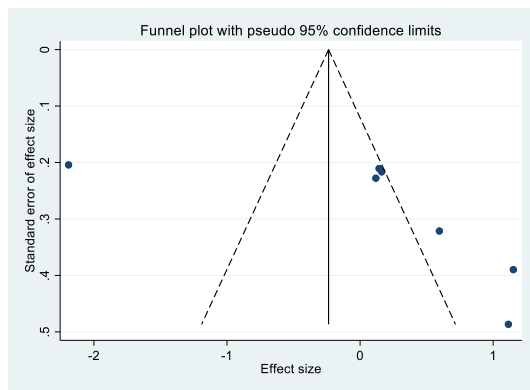

**Figure S2 (A-B):** Funnel plot for the prediction of Last follow-up mortality in acute stroke with respect to elevated cTn Levels

(A) AIS: p-value= 0.13

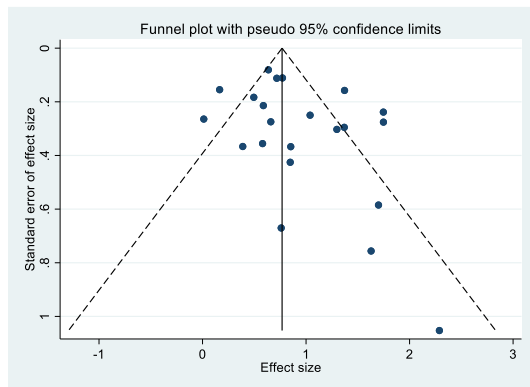

(B) SAH: p-value= 0.42

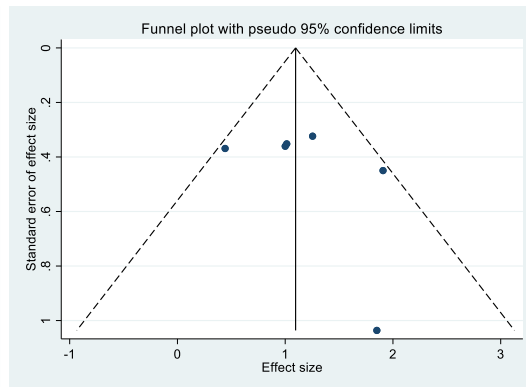

**Figure S3(A):** Sensitivity plot for the prediction of In-hospital mortality in AIS with respect to elevated cTn Levels

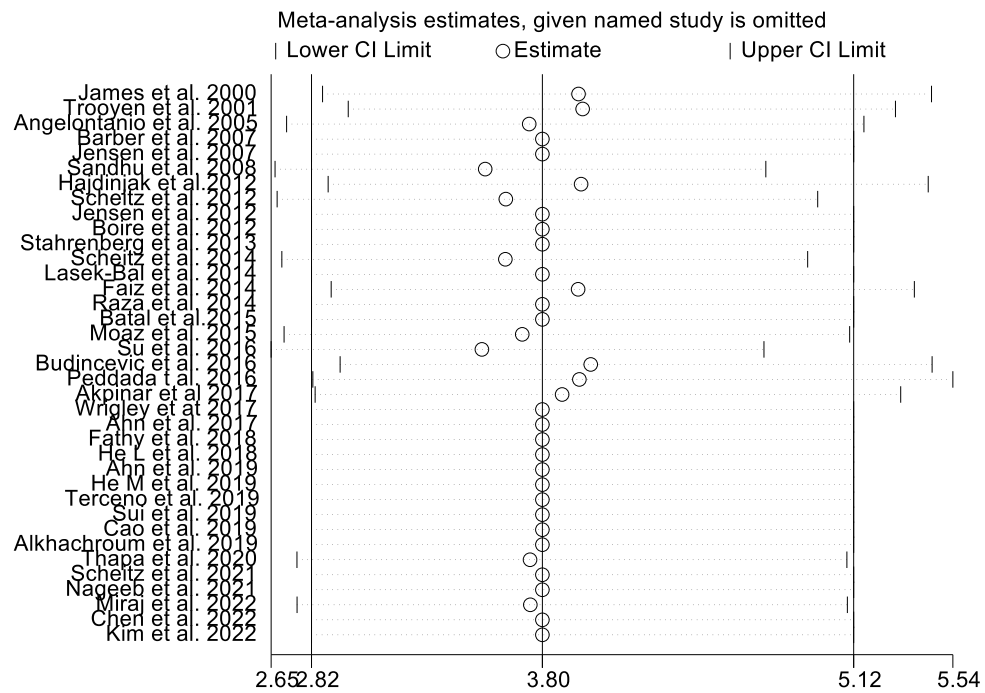

**Figure S3(B):** Sensitivity plot for the prediction of In-hospital mortality in SAH with respect to elevated cTn Levels

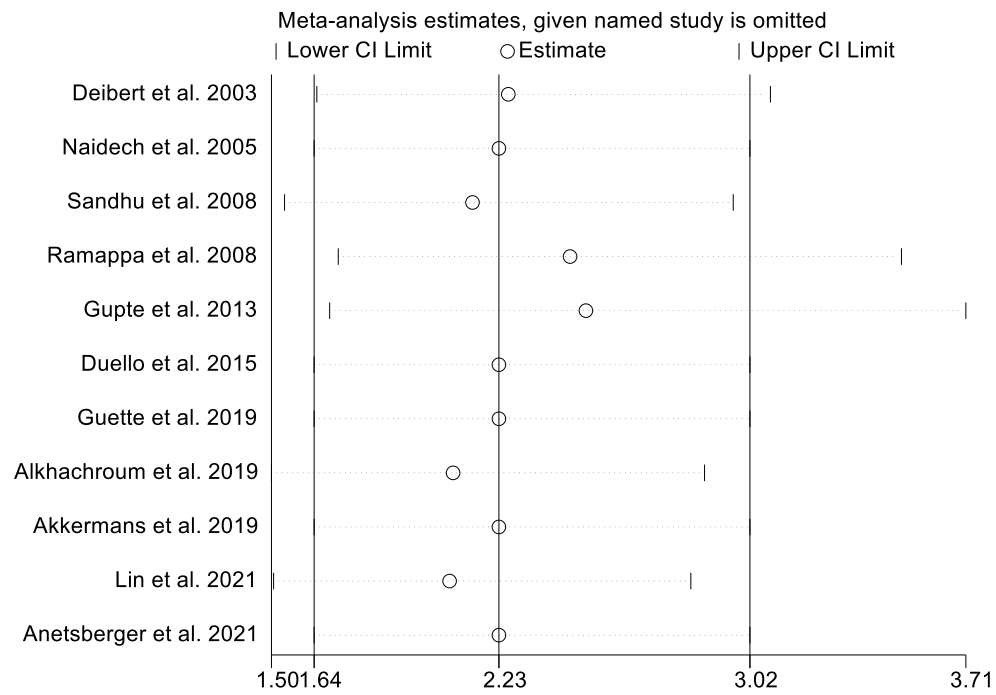

**Figure S3(C):** Sensitivity plot for the prediction of In hospital mortality in ICH with respect to elevated cTn Levels

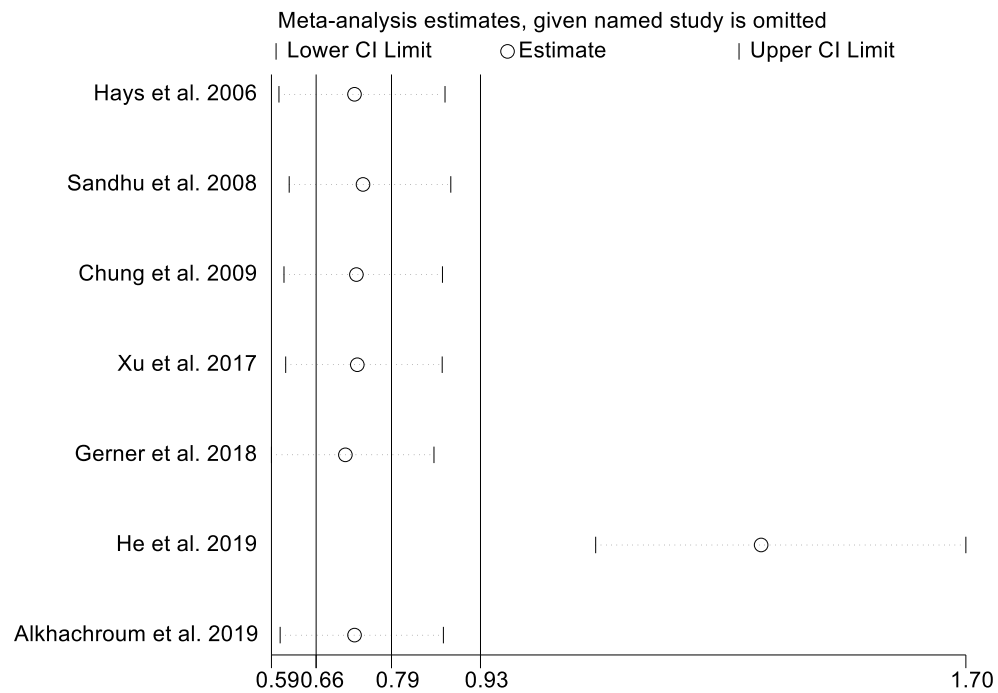

**Figure S4(A):** Sensitivity plot for the prediction of last follow-up mortality in AIS with respect to elevated cTn Levels

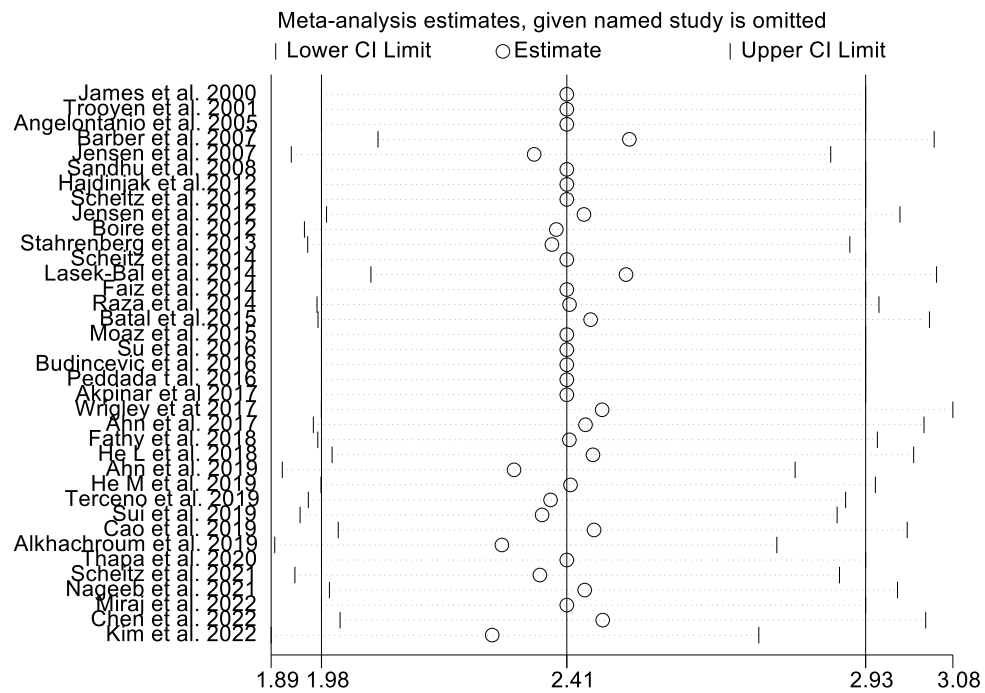

**Figure S4(B):** Sensitivity plot for the prediction of last follow-up mortality in SAH with respect to elevated cTn Levels

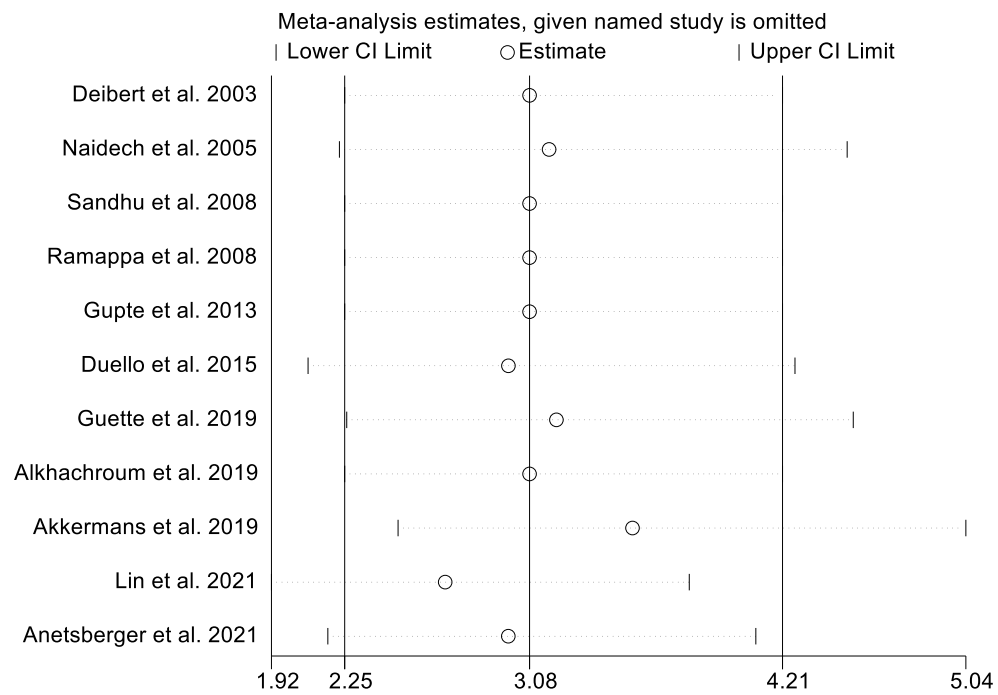

Supplement: Image_1.pdf [file Image_1.pdf]
